# Supplementary material for: Efficacy of Remote Cognitive Behavioural Therapy for Insomnia in Improving Health Status of Patients with Insomnia Symptoms: A Meta-analysis
Source: Springer Nature journal article supplement (doi:10.1007/s10608-023-10458-6), 2024-01-13
Supplement: MOESM3 [file 26627080]

|                               | subjects were randomly allocated to groups | allocation was concealed | the groups were similar at baseline regarding the most important prognostic indicators | there was blinding of all subjects | there was blinding of all therapists who administered the therapy | there was blinding of all assessors who measured at least one key outcome | measures of at least one key outcome were obtained from more than 85% of the subjects initially allocated to groups | all subjects for whom outcome measures were available received the treatment or control condition as allocated | the results of between-group statistical comparisons are reported for at least one key outcome | the study provides both point measures and measures of variability for at least one key outcome | Total score |
|-------------------------------|--------------------------------------------|--------------------------|----------------------------------------------------------------------------------------|------------------------------------|-------------------------------------------------------------------|---------------------------------------------------------------------------|---------------------------------------------------------------------------------------------------------------------|----------------------------------------------------------------------------------------------------------------|------------------------------------------------------------------------------------------------|-------------------------------------------------------------------------------------------------|-------------|
| Abdelaziz, et al., 2022       | 1                                          | 1                        | 1                                                                                      | 0                                  | 1                                                                 | 0                                                                         | 1                                                                                                                   | 1                                                                                                              | 1                                                                                              | 1                                                                                               | 8           |
| Ahorsu, et al., 2020          | 1                                          | 1                        | 1                                                                                      | 0                                  | 0                                                                 | 0                                                                         | 1                                                                                                                   | 1                                                                                                              | 0                                                                                              | 1                                                                                               | 6           |
| Arnedt, et al., 2013          | 1                                          | 1                        | 1                                                                                      | 1                                  | 1                                                                 | 0                                                                         | 1                                                                                                                   | 1                                                                                                              | 1                                                                                              | 1                                                                                               | 9           |
| Arnedt, et al., 2021          | 1                                          | 0                        | 1                                                                                      | 0                                  | 0                                                                 | 0                                                                         | 0                                                                                                                   | 1                                                                                                              | 1                                                                                              | 1                                                                                               | 5           |
| Blom, et al., 2015            | 1                                          | 1                        | 1                                                                                      | 1                                  | 1                                                                 | 1                                                                         | 1                                                                                                                   | 1                                                                                                              | 0                                                                                              | 1                                                                                               | 9           |
| Brenes, et al., 2012          | 1                                          | 1                        | 1                                                                                      | 1                                  | 1                                                                 | 1                                                                         | 1                                                                                                                   | 0                                                                                                              | 1                                                                                              | 1                                                                                               | 9           |
| Chan, et al., 2023            | 1                                          | 1                        | 1                                                                                      | 0                                  | 1                                                                 | 1                                                                         | 1                                                                                                                   | 0                                                                                                              | 1                                                                                              | 1                                                                                               | 8           |
| Chapoutot, et al., 2021       | 1                                          | 1                        | 0                                                                                      | 1                                  | 1                                                                 | 0                                                                         | 1                                                                                                                   | 0                                                                                                              | 1                                                                                              | 1                                                                                               | 7           |
| Cheng, et al., 2019           | 1                                          | 1                        | 1                                                                                      | 0                                  | 1                                                                 | 1                                                                         | 1                                                                                                                   | 1                                                                                                              | 1                                                                                              | 1                                                                                               | 9           |
| Espie, et al., 2012           | 1                                          | 1                        | 1                                                                                      | 1                                  | 1                                                                 | 0                                                                         | 1                                                                                                                   | 1                                                                                                              | 1                                                                                              | 1                                                                                               | 9           |
| Freeman, et al., 2015         | 1                                          | 0                        | 1                                                                                      | 0                                  | 0                                                                 | 1                                                                         | 0                                                                                                                   | 0                                                                                                              | 1                                                                                              | 1                                                                                               | 5           |
| Freeman, et al., 2017         | 1                                          | 0                        | 1                                                                                      | 1                                  | 0                                                                 | 1                                                                         | 0                                                                                                                   | 0                                                                                                              | 1                                                                                              | 1                                                                                               | 6           |
| Gieselmann et al., 2019       | 1                                          | 0                        | 1                                                                                      | 0                                  | 0                                                                 | 1                                                                         | 1                                                                                                                   | 0                                                                                                              | 1                                                                                              | 1                                                                                               | 6           |
| Glozier, et al., 2019         | 1                                          | 0                        | 1                                                                                      | 0                                  | 0                                                                 | 1                                                                         | 0                                                                                                                   | 0                                                                                                              | 1                                                                                              | 1                                                                                               | 5           |
| Godzic, et al., 2021          | 1                                          | 1                        | 1                                                                                      | 0                                  | 1                                                                 | 0                                                                         | 1                                                                                                                   | 0                                                                                                              | 1                                                                                              | 1                                                                                               | 7           |
| Hagatun, et al., 2019         | 1                                          | 1                        | 1                                                                                      | 0                                  | 1                                                                 | 1                                                                         | 1                                                                                                                   | 1                                                                                                              | 1                                                                                              | 1                                                                                               | 9           |
| Ho, et al., 2014              | 1                                          | 1                        | 1                                                                                      | 1                                  | 1                                                                 | 1                                                                         | 1                                                                                                                   | 0                                                                                                              | 1                                                                                              | 1                                                                                               | 9           |
| Horsch, et al., 2017          | 1                                          | 0                        | 1                                                                                      | 0                                  | 1                                                                 | 0                                                                         | 0                                                                                                                   | 0                                                                                                              | 1                                                                                              | 1                                                                                               | 5           |
| Hürlimann, et al., 2023       | 1                                          | 1                        | 0                                                                                      | 0                                  | 1                                                                 | 1                                                                         | 1                                                                                                                   | 0                                                                                                              | 1                                                                                              | 1                                                                                               | 6           |
| Jernelöv, et al., 2012        | 1                                          | 1                        | 1                                                                                      | 1                                  | 0                                                                 | 1                                                                         | 0                                                                                                                   | 1                                                                                                              | 0                                                                                              | 1                                                                                               | 7           |
| Kaldo, et al., 2015           | 1                                          | 0                        | 1                                                                                      | 0                                  | 1                                                                 | 0                                                                         | 1                                                                                                                   | 0                                                                                                              | 1                                                                                              | 1                                                                                               | 6           |
| Kalmbach, et al., 2020        | 1                                          | 0                        | 1                                                                                      | 0                                  | 0                                                                 | 1                                                                         | 0                                                                                                                   | 1                                                                                                              | 1                                                                                              | 1                                                                                               | 6           |
| Lancee, et al., 2016          | 1                                          | 0                        | 1                                                                                      | 0                                  | 1                                                                 | 1                                                                         | 0                                                                                                                   | 0                                                                                                              | 1                                                                                              | 1                                                                                               | 6           |
| Lokman, et al., 2017          | 1                                          | 1                        | 1                                                                                      | 1                                  | 1                                                                 | 1                                                                         | 0                                                                                                                   | 1                                                                                                              | 1                                                                                              | 1                                                                                               | 9           |
| Lorenz, et al., 2019          | 1                                          | 0                        | 1                                                                                      | 0                                  | 0                                                                 | 0                                                                         | 0                                                                                                                   | 1                                                                                                              | 1                                                                                              | 1                                                                                               | 5           |
| McCurry, et al., 2016         | 1                                          | 1                        | 1                                                                                      | 1                                  | 1                                                                 | 1                                                                         | 1                                                                                                                   | 1                                                                                                              | 0                                                                                              | 1                                                                                               | 9           |
| McCurry, et al., 2021         | 1                                          | 1                        | 1                                                                                      | 1                                  | 1                                                                 | 1                                                                         | 1                                                                                                                   | 0                                                                                                              | 1                                                                                              | 1                                                                                               | 9           |
| Morris, et al., 2016          | 1                                          | 1                        | 1                                                                                      | 0                                  | 1                                                                 | 1                                                                         | 0                                                                                                                   | 1                                                                                                              | 0                                                                                              | 1                                                                                               | 7           |
| Oswald, et al., 2022          | 1                                          | 1                        | 0                                                                                      | 1                                  | 1                                                                 | 1                                                                         | 0                                                                                                                   | 0                                                                                                              | 1                                                                                              | 1                                                                                               | 7           |
| Rajabi Majd, et al., 2020     | 1                                          | 1                        | 1                                                                                      | 0                                  | 1                                                                 | 1                                                                         | 1                                                                                                                   | 1                                                                                                              | 1                                                                                              | 1                                                                                               | 9           |
| Ritterband, et al., 2009      | 1                                          | 1                        | 1                                                                                      | 1                                  | 1                                                                 | 1                                                                         | 0                                                                                                                   | 1                                                                                                              | 1                                                                                              | 1                                                                                               | 9           |
| Ritterband, et al., 2017      | 1                                          | 1                        | 1                                                                                      | 1                                  | 1                                                                 | 1                                                                         | 1                                                                                                                   | 1                                                                                                              | 0                                                                                              | 1                                                                                               | 9           |
| Siebmans, et al., 2021        | 1                                          | 1                        | 1                                                                                      | 1                                  | 1                                                                 | 1                                                                         | 1                                                                                                                   | 0                                                                                                              | 1                                                                                              | 1                                                                                               | 9           |
| Thorndike, et al., 2013       | 1                                          | 1                        | 0                                                                                      | 1                                  | 1                                                                 | 0                                                                         | 1                                                                                                                   | 0                                                                                                              | 1                                                                                              | 1                                                                                               | 7           |
| van der Zweerde, et al., 2019 | 1                                          | 1                        | 1                                                                                      | 0                                  | 1                                                                 | 1                                                                         | 0                                                                                                                   | 1                                                                                                              | 1                                                                                              | 1                                                                                               | 8           |
| van der Zweerde, et al., 2020 | 1                                          | 0                        | 1                                                                                      | 0                                  | 1                                                                 | 1                                                                         | 0                                                                                                                   | 0                                                                                                              | 1                                                                                              | 1                                                                                               | 6           |
| van Straten, et al., 2014     | 1                                          | 1                        | 1                                                                                      | 1                                  | 1                                                                 | 0                                                                         | 1                                                                                                                   | 1                                                                                                              | 1                                                                                              | 1                                                                                               | 9           |
| Vedaa, et al., 2020           | 1                                          | 0                        | 1                                                                                      | 0                                  | 1                                                                 | 0                                                                         | 0                                                                                                                   | 1                                                                                                              | 1                                                                                              | 1                                                                                               | 6           |
| Vincent & Lewycky, 2009       | 1                                          | 1                        | 1                                                                                      | 1                                  | 1                                                                 | 1                                                                         | 1                                                                                                                   | 1                                                                                                              | 0                                                                                              | 1                                                                                               | 9           |
| Yeung, et al., 2022           | 1                                          | 1                        | 1                                                                                      | 0                                  | 0                                                                 | 1                                                                         | 1                                                                                                                   | 0                                                                                                              | 1                                                                                              | 1                                                                                               | 6           |
| Zachariae, et al., 2018       | 1                                          | 1                        | 1                                                                                      | 0                                  | 1                                                                 | 1                                                                         | 1                                                                                                                   | 1                                                                                                              | 1                                                                                              | 1                                                                                               | 9           |
| Zhang, et al., 2023           | 1                                          | 1                        | 1                                                                                      | 1                                  | 1                                                                 | 1                                                                         | 1                                                                                                                   | 0                                                                                                              | 1                                                                                              | 1                                                                                               | 9           |
